# Supplementary material for: Aerobic degradation of crude oil by microorganisms in soils from four geographic regions of China
Source: PubMed Central journal article supplement (PMC5665864; doi:10.1038/s41598-017-14032-5), 2017-11-01
Supplement: 41598_2017_14032_MOESM1_ESM.pdf [file 41598_2017_14032_MOESM1_ESM.pdf]

1 **Aerobic degradation of crude oil by microorganisms in soils**  
2 **from four geographic regions of China**

3 Qinglong Liu<sup>1</sup>, Jingchun Tang<sup>\*1,2,3</sup>, Kai Gao<sup>4</sup>, Ranjit Gurav<sup>1</sup>, John P Giesy<sup>5,6,7,8,9</sup>

4 <sup>1</sup>College of Environmental Science and Engineering, Nankai University, Tianjin 300071, China

5 <sup>2</sup>Tianjin Engineering Center of Environmental Diagnosis and Contamination Remediation, Tianjin  
6 300071, China

7 <sup>3</sup>Key Laboratory of Pollution Processes and Environmental Criteria (Ministry of Education),  
8 Tianjin 300071, China

9 <sup>4</sup>Tianjin Academy of Environmental Sciences, Tianjin 300191, China

10 <sup>5</sup>Toxicology Centre, University of Saskatchewan, Saskatoon, Saskatchewan, Canada

11 <sup>6</sup>Department of Veterinary Biomedical Sciences, University of Saskatchewan, Saskatoon,  
12 Saskatchewan, Canada

13 <sup>7</sup>School of Biological Sciences, University of Hong Kong, Hong Kong, SAR, China

14 <sup>8</sup>State Key Laboratory of Pollution Control and Resource Reuse, School of the Environment,  
15 Nanjing University, Nanjing, People's Republic of China

16 <sup>9</sup>Department of Biology, Hong Kong Baptist University, Hong Kong, SAR, China

17 \* Corresponding author: Jingchun Tang

18 Tel.: +86-22-83614117, Fax: +86-22-83614117

19 E-mail address: tangjch@nankai.edu.cn

20

21

22

23

24 **Table S1.** Summary of sizes of libraries of sequences for operational taxonomic units (OTUs), and  
25 diversity indices based on 16S rRNA gene sequences during incubations of soils in microcosms.

| Samples | Number of sequences | Number of OTUs | Ace | Chao I richness | Shannon(H') | Simpson | Coverage (%) |
|---------|---------------------|----------------|-----|-----------------|-------------|---------|--------------|
| DG0d    | 5777                | 247            | 262 | 263             | 3.58        | 0.0347  | 99.48        |
| DG112d  | 7872                | 195            | 239 | 238             | 3.36        | 0.0723  | 99.39        |
| SS0d    | 10029               | 187            | 236 | 240             | 1.72        | 0.4767  | 99.46        |
| SS112d  | 11802               | 114            | 140 | 135             | 2.43        | 0.1643  | 99.76        |
| NE0d    | 12297               | 270            | 302 | 312             | 4.16        | 0.0643  | 99.61        |
| NE112d  | 10673               | 94             | 120 | 121             | 2.88        | 0.1904  | 99.76        |
| XM0d    | 11238               | 123            | 140 | 138             | 2.64        | 0.1562  | 99.78        |
| XM112d  | 13854               | 139            | 150 | 152             | 3.05        | 0.0874  | 99.86        |

26 Calculations based on the operational taxonomic units (OTUs) determined at an evolutionary distance  
27 of 0.03.

28

29

30

31

32

33

34

35 **Table S2.** Results of sequencing of DGGE bands.

| Sequence | Homologous strains                                    | Identity | accession number in ENA |
|----------|-------------------------------------------------------|----------|-------------------------|
| D0-1     | <i>Marinobacter</i>                                   | 99%      | LN649243                |
| D0-2     | Uncultured <i>alpha</i><br><i>proteobacterium</i> sp. | 100%     | LN649242                |
| D0-3     | Uncultured<br><i>Rhodanobacter</i> sp.                | 98%      | LN649253                |
| D8-1     | Uncultured<br><i>Rhodanobacter</i> sp.                | 99%      | LN649253                |
| D16-1    | <i>Marinobacter</i>                                   | 99%      | LN681343                |
| D16-2    | <i>Brevundimonas</i> sp.                              | 100%     | LN681344                |
| S0-1     | <i>Pseudomonas</i> sp.                                | 99%      | LN649240                |
| S1-1     | <i>Streptomyces</i> sp.                               | 100%     | LN649246                |
| S1-2     | Uncultured bacterium                                  | 98%      | LN649248                |
| S16-1    | Uncultured <i>alpha</i><br><i>proteobacterium</i> sp. | 98%      | LN681346                |
| N0-1     | <i>Pseudomonas</i> sp.                                | 99%      | LN649240                |
| N4-1     | <i>Burkholderia</i> sp.                               | 100%     | LN649249                |
| N8-1     | Uncultured <i>alpha</i><br><i>proteobacterium</i> sp. | 100%     | LN649252                |
| N8-2     | Uncultured<br><i>Rhodanobacter</i> sp.                | 99%      | LN649253                |
| X0-1     | Uncultured bacterium                                  | 98%      | LN649244                |
| X16-1    | <i>Brevundimonas</i> sp.                              | 100%     | LN681344                |
| X16-2    | <i>Burkholderia</i> sp.                               | 100%     | LN649249                |

36

37

38

39

40 **Table S3.** Shannon-Weiner index quantified based on the DGGE profile.

| Samples | 0d   |       | 7d   |       | 28d  |       | 56d  |       | 112d |       |
|---------|------|-------|------|-------|------|-------|------|-------|------|-------|
|         | CK   | Crude | CK   | Crude | CK   | Crude | CK   | Crude | CK   | Crude |
|         |      | oil   |      | oil   |      | oil   |      | oil   |      | oil   |
| DG      | 3.23 | 3.4   | 3.13 | 2.86  | 3.33 | 3.38  | 3.45 | 3.51  | 3.44 | 3.16  |
| SS      | 2.24 | 2.16  | 2.15 | 2.03  | 2.99 | 3.12  | 2.85 | 2.96  | 2.83 | 3.13  |
| NE      | 3.85 | 3.36  | 3.39 | 2.52  | 3.22 | 2.74  | 3.46 | 2.53  | 3.43 | 2.66  |
| XM      | 2.92 | 2.65  | 2.06 | 2.78  | 2.78 | 3.16  | 2.65 | 2.49  | 2.86 | 2.97  |

41

42

43

44

45

46

47

48

49

50

51

52

53

54

55

56

57

58

59

60

61

62 **Table S4.** Absolute numbers of copies of oil-degrading genes in soils from four regions of China.

| Samples                  |      | DG                            | SS                            | NE                            | XM                            |
|--------------------------|------|-------------------------------|-------------------------------|-------------------------------|-------------------------------|
| Abundance of             | 0d   | $(2.75 \pm 0.40) \times 10^4$ | $(3.44 \pm 0.13) \times 10^5$ | $(5.42 \pm 0.31) \times 10^5$ | $(3.44 \pm 0.53) \times 10^4$ |
| <i>AlkB</i> (copies/g,   | 7d   | $(2.69 \pm 0.65) \times 10^5$ | $(4.23 \pm 0.12) \times 10^5$ | $(6.15 \pm 0.25) \times 10^5$ | $(5.57 \pm 0.37) \times 10^4$ |
| dm soil)                 | 28d  | $(1.51 \pm 0.46) \times 10^6$ | $(3.40 \pm 0.57) \times 10^7$ | $(3.23 \pm 0.21) \times 10^7$ | $(2.90 \pm 0.35) \times 10^6$ |
|                          | 56d  | $(2.73 \pm 0.26) \times 10^6$ | $(5.79 \pm 0.43) \times 10^7$ | $(6.33 \pm 0.42) \times 10^7$ | $(1.70 \pm 0.53) \times 10^7$ |
|                          | 112d | $(2.30 \pm 0.16) \times 10^6$ | $(6.29 \pm 0.32) \times 10^7$ | $(7.39 \pm 0.34) \times 10^7$ | $(2.48 \pm 0.32) \times 10^7$ |
| Abundance of             | 0d   | $(4.62 \pm 0.23) \times 10^3$ | $(1.34 \pm 0.26) \times 10^3$ | $(1.22 \pm 0.42) \times 10^3$ | $(1.33 \pm 0.39) \times 10^3$ |
| <i>Nah</i> (copies/g, dm | 7d   | $(2.83 \pm 0.53) \times 10^4$ | $(3.72 \pm 0.43) \times 10^4$ | $(2.26 \pm 0.51) \times 10^4$ | $(7.85 \pm 0.57) \times 10^3$ |
| soil)                    | 28d  | $(4.34 \pm 0.57) \times 10^4$ | $(5.37 \pm 0.35) \times 10^5$ | $(4.31 \pm 0.34) \times 10^5$ | $(2.95 \pm 0.43) \times 10^5$ |
|                          | 56d  | $(6.71 \pm 0.63) \times 10^4$ | $(7.53 \pm 0.72) \times 10^5$ | $(6.21 \pm 0.48) \times 10^5$ | $(3.54 \pm 0.32) \times 10^5$ |
|                          | 112d | $(1.29 \pm 0.43) \times 10^5$ | $(5.36 \pm 0.64) \times 10^6$ | $(4.23 \pm 0.73) \times 10^6$ | $(6.42 \pm 0.55) \times 10^5$ |
| Abundance of <i>Phe</i>  | 0d   | $(2.39 \pm 0.36) \times 10^3$ | $(8.12 \pm 0.55) \times 10^3$ | $(1.31 \pm 0.12) \times 10^3$ | $(1.53 \pm 0.19) \times 10^3$ |
| (copies/g, dm soil)      | 7d   | $(1.68 \pm 0.25) \times 10^4$ | $(1.39 \pm 0.55) \times 10^5$ | $(9.40 \pm 0.24) \times 10^4$ | $(2.36 \pm 0.17) \times 10^3$ |
|                          | 28d  | $(5.54 \pm 0.54) \times 10^4$ | $(9.67 \pm 0.25) \times 10^5$ | $(1.30 \pm 0.97) \times 10^6$ | $(9.40 \pm 0.13) \times 10^4$ |
|                          | 56d  | $(8.91 \pm 0.32) \times 10^4$ | $(3.12 \pm 0.75) \times 10^6$ | $(4.47 \pm 0.42) \times 10^6$ | $(4.72 \pm 0.42) \times 10^5$ |
|                          | 112d | $(1.14 \pm 0.47) \times 10^5$ | $(2.99 \pm 0.23) \times 10^6$ | $(3.49 \pm 0.42) \times 10^6$ | $(5.32 \pm 0.26) \times 10^5$ |
| Abundance of 16S         | 0d   | $(6.52 \pm 0.34) \times 10^7$ | $(2.85 \pm 0.54) \times 10^8$ | $(2.57 \pm 0.48) \times 10^8$ | $(1.52 \pm 0.29) \times 10^7$ |
| rRNA (copies/g,          | 7d   | $(4.34 \pm 0.12) \times 10^7$ | $(2.65 \pm 0.21) \times 10^8$ | $(9.40 \pm 0.64) \times 10^8$ | $(1.10 \pm 0.22) \times 10^7$ |
| dm soil)                 | 28d  | $(7.50 \pm 0.44) \times 10^7$ | $(1.14 \pm 0.45) \times 10^8$ | $(1.30 \pm 0.37) \times 10^9$ | $(1.15 \pm 0.23) \times 10^8$ |
|                          | 56d  | $(9.18 \pm 0.37) \times 10^7$ | $(1.94 \pm 0.55) \times 10^9$ | $(4.47 \pm 0.42) \times 10^9$ | $(5.07 \pm 0.32) \times 10^8$ |
|                          | 112d | $(8.92 \pm 0.48) \times 10^7$ | $(1.22 \pm 0.36) \times 10^9$ | $(3.49 \pm 0.31) \times 10^9$ | $(6.43 \pm 0.46) \times 10^8$ |

63

64

65

66

67

68

69

70

71

72 **Table S5.** Sequences, sizes of amplicons, and annealing temperatures of primer sets for qPCR.

| Degradation genes | Proteins targeted       |       | Sequence(5'-3')           | Amplicon size (bp) | PCR annealing temperature( °C) | Reference |
|-------------------|-------------------------|-------|---------------------------|--------------------|--------------------------------|-----------|
| <i>AlkB</i>       | Alkane monooxygenases   | AlkB  | AACTACMTCGA               | 100                | 50                             | 1         |
|                   |                         | -F    | RCAYTACGG                 |                    |                                |           |
|                   |                         | AlkB  | TGAMGATGTGG               |                    |                                |           |
|                   |                         | -R    | TYRCTGTTCC                |                    |                                |           |
| <i>NahAc</i>      | Naphthalene dioxygenase | NahA  | ACTTGGTTCCGG              | 136                | 57                             | 2         |
|                   |                         | c-F   | AGTTGATG                  |                    |                                |           |
|                   |                         | NahA  | CAGGTCAGCAT               |                    |                                |           |
|                   |                         | c-R   | GCTGTTGTT                 |                    |                                |           |
| <i>Phe</i>        | Phenol monooxygenase    | Phe-F | GTGCTGAC(C/G)             | 206                | 49                             | 3         |
|                   |                         |       | AA(C/T)CTG(C/T)           |                    |                                |           |
|                   |                         |       | TGTTC                     |                    |                                |           |
|                   |                         | Phe-R | CGCCAGAACCA(C/T)TT(A/G)TC |                    |                                |           |
| 16S rDNA          | Conservative region     | 16S-F | CGGTGAATACGT              | 140                | 55                             | 4         |
|                   |                         |       | TCYCGG                    |                    |                                |           |
|                   |                         | 16S-R | CGGTGAATACGT              |                    |                                |           |
|                   |                         |       | TCYCGG                    |                    |                                |           |

73

74 **References**

- 75 1. Powell, S.M., Bowman, J.P., Ferguson, S.H. & Snape, I. The importance of soil characteristics  
76 to the structure of alkane-degrading bacterial communities on sub-Antarctic Macquarie Island.  
77 *Soil Biol Biochem* **42**, 2012-2021 (2010).
- 78 2. Park, J.-W. & Crowley, D.E. Dynamic changes in *nahAc* gene copy numbers during  
79 degradation of naphthalene in PAH-contaminated soils. *Appl Microbiol Biot* **72**, 1322-1329

80 (2006).

81 3. Baldwin, B.R., Nakatsu, C.H. & Nies, L. Detection and enumeration of aromatic oxygenase  
82 genes by multiplex and real-time PCR. *Appl Environ Microbiol* **69**, 3350-3358 (2003).

83 4. Suzuki, M.T., Taylor, L.T. & DeLong, E.F. Quantitative analysis of small-subunit rRNA genes  
84 in mixed microbial populations via 5'-nuclease assays. *Appl Environ Microbiol* **66**, 4605-4614  
85 (2000).

86

87

88

89

90

91

92

93

94

95

96

97

98

99

100

101

102

103

104

105

106

107

108

109

110

111

112

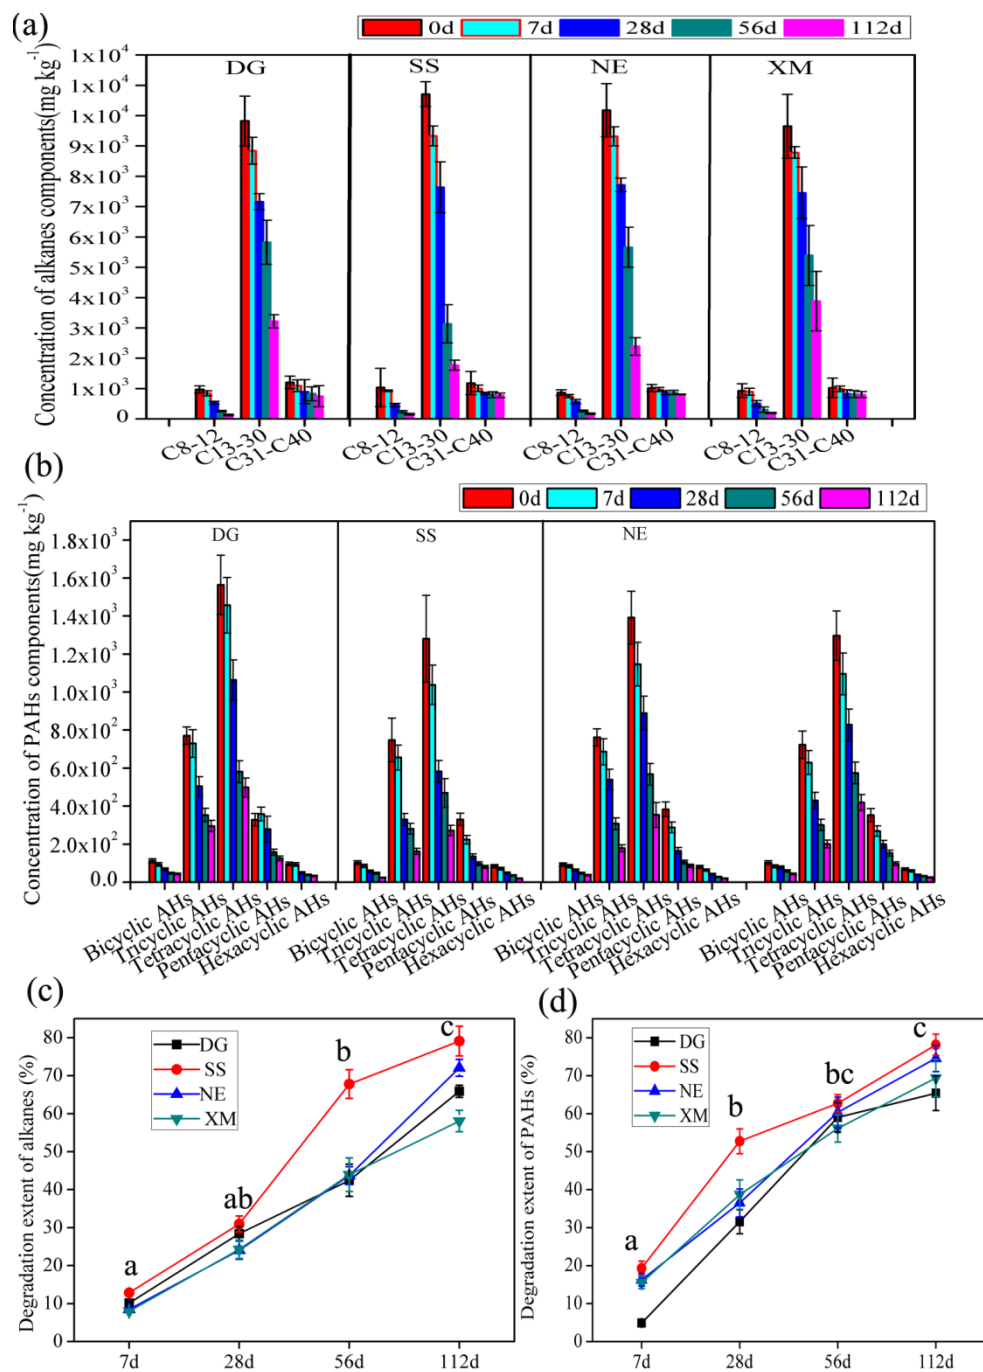

113

114 **Figure S1.** Residual concentrations and degradation of alkanes (C8-C40) and PAHs in soils quantified  
 115 by use of GC-MS. (a) Concentrations of shorter-chain alkanes (C8-C12), medium-chain alkanes  
 116 (C13-C30), and longer-chain alkanes (C31-C40). (b) Concentration of bicyclic, tricyclic, tetracyclic,  
 117 pentacyclic, and hexacyclic PAHs. (c) Degradation extent of shorter-chain alkanes (C8-C12),  
 118 medium-chain alkanes (C13-C30), and longer-chain alkanes (C31-C40). (d) Degradation extent of  
 119 bicyclic, tricyclic, tetracyclic, pentacyclic, and hexacyclic PAHs.



120 Letters on the graph indicate a significant difference among different sampling times at  $p < 0.05$   
 121 according to Duncan's multiple range tests of One-Way ANOVA.  
 122

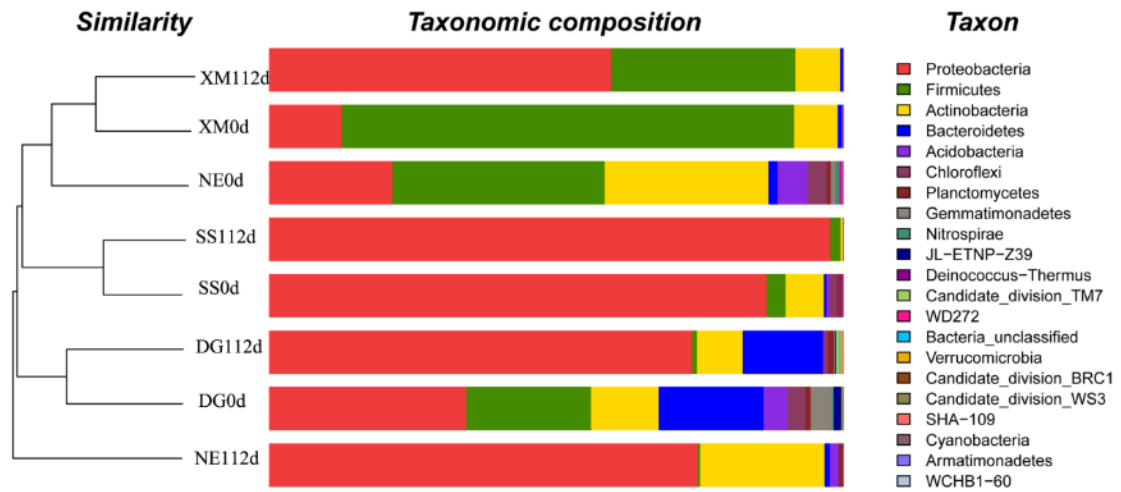

123 **Figure S2.** Results of cluster analysis and taxonomic composition of the microbial communities based  
 124 on HTS. Mean proportions of bacterial phyla in studied soil groups. Phyla representing more than 2%  
 125 of the bacterial community are summarized.  
 126

127  
 128  
 129  
 130  
 131  
 132  
 133  
 134  
 135  
 136  
 137  
 138  
 139  
 140  
 141  
 142

143

144

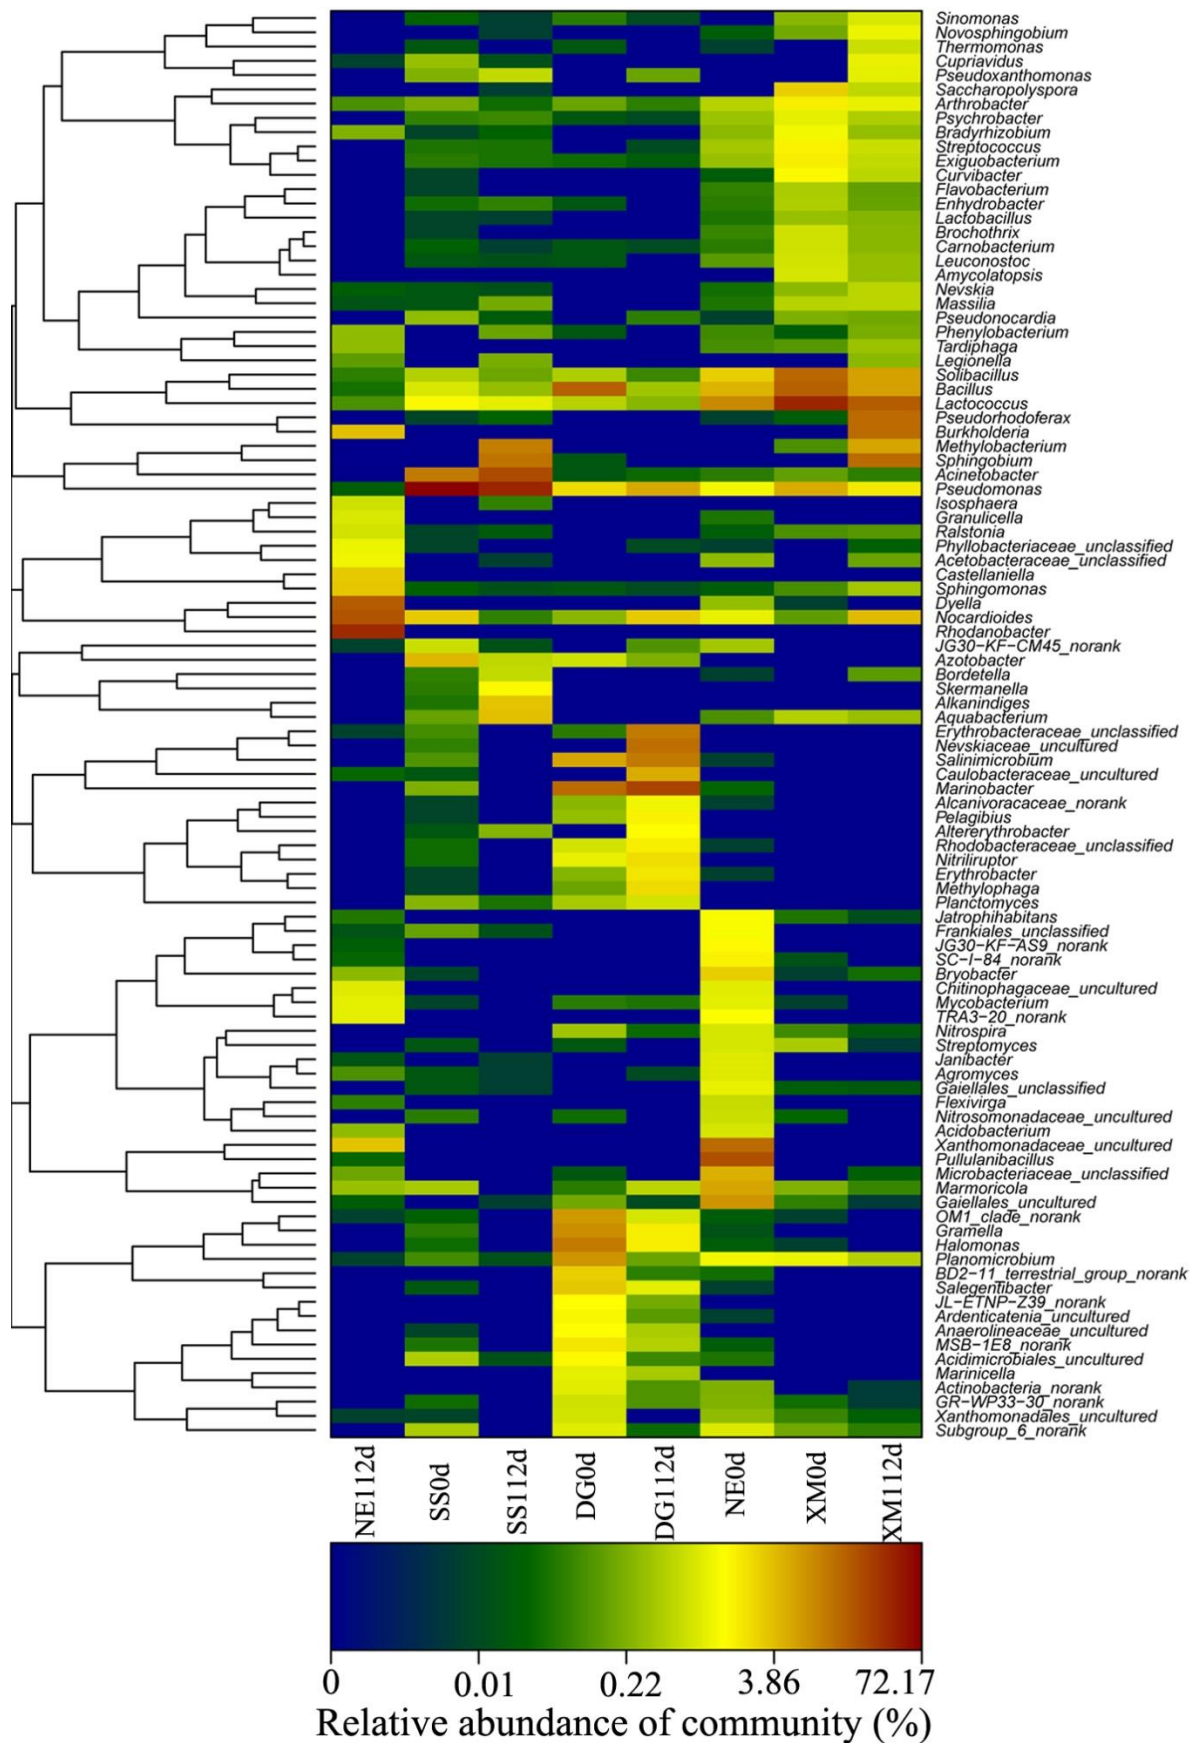

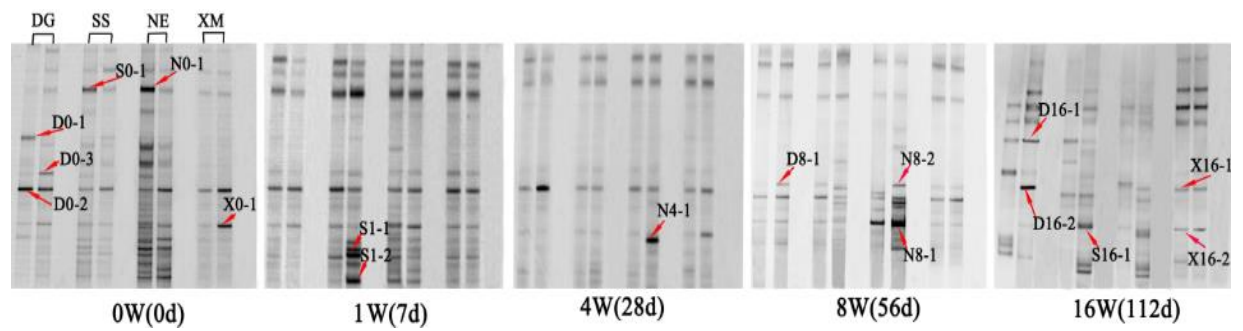

148

149 **Figure S4.** DGGE profile of soils from four typically geographical regions. DGGE bands collected

150 from four soils were of the same order of magnitude as the first picture. In each soil, two bands

151 represented blank control and with addition of 5% (by weight) crude oil, respectively. DG: Dagang

152 Oilfield; SS: Sea Sand; NE: Northeast China; XM: Xiamen.

153

154

155

156

157

158

159

160

161

162

163

164

165

166

167

168

169

170

171

172

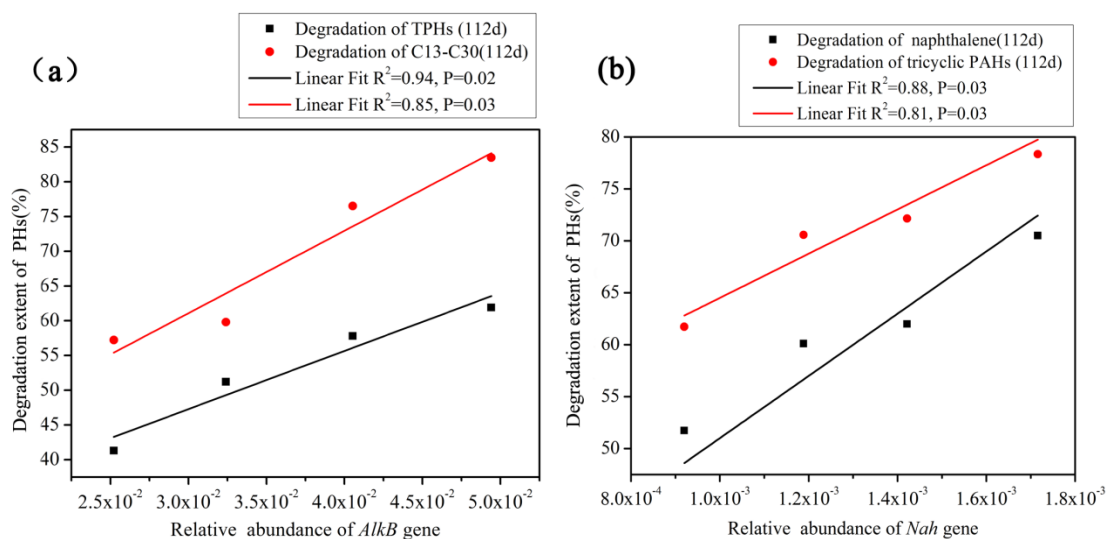

174

175 **Figure S5.** Pairwise correlations between metabolic gene abundances and PHs degradation. (a)176 Correlation between relative abundances of *AlkB* gene and oil degradation; (b) Correlation between177 *Nah* gene abundances and oil degradation.

178

179

180

181

182

183

184

185

186

187

188

189

190

191

192

193

194

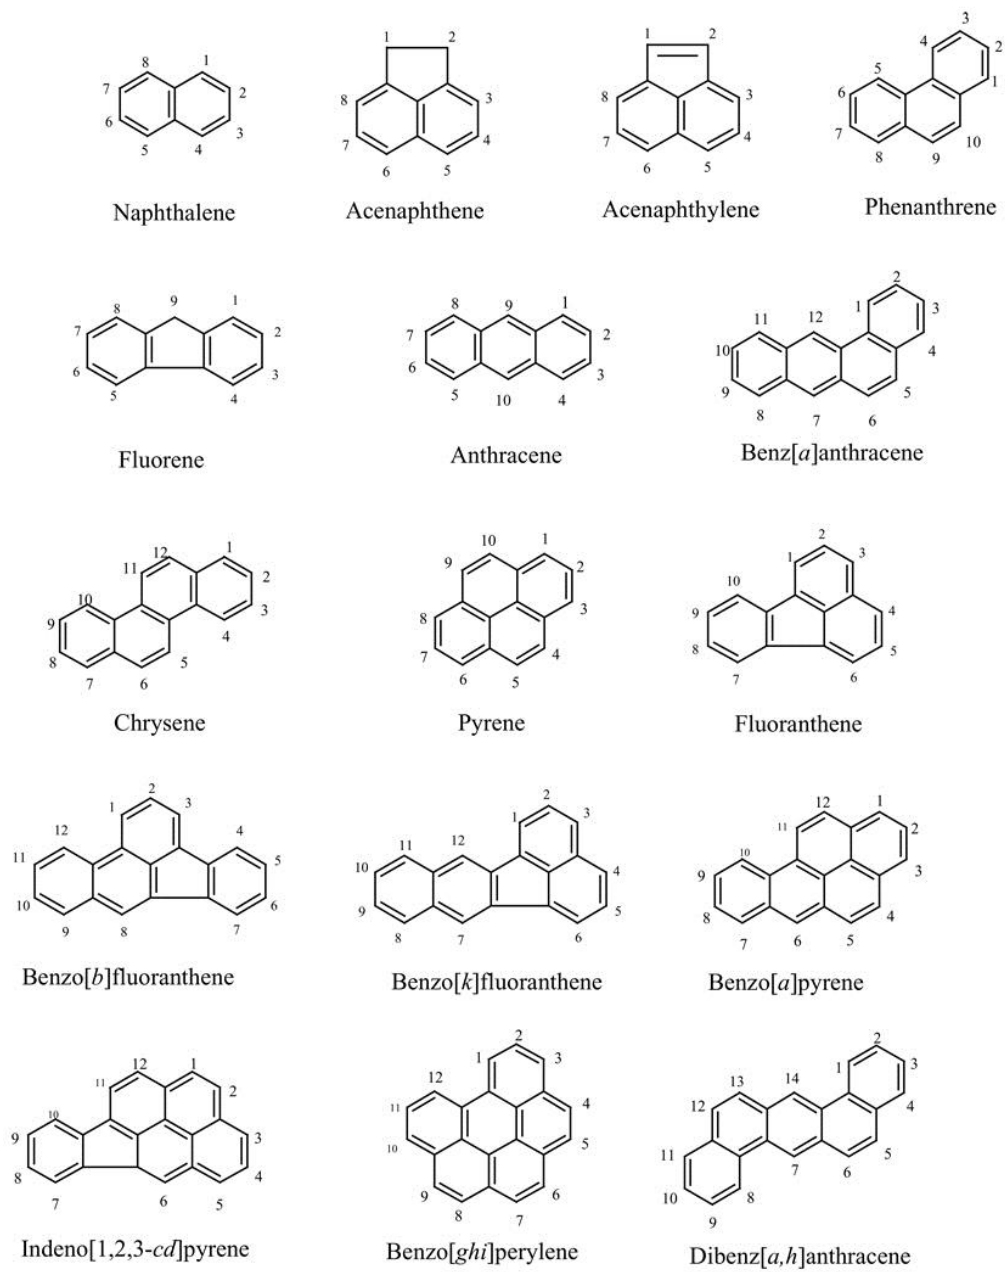

195

196 **Figure S6.** Structures and nomenclatures of the 16 PAHs on the EPA priority pollutant list.

197
